# Supplementary material for: Aromatic sulfonium polyoxomolybdates: tuning the photochromic properties through substitutions on the counter ion moiety
Source: Royal Society of Chemistry journal article supplement (doi:10.1039/c8ce00345a), 2018-01-01
Supplement: c8ce00345a1.pdf [file c8ce00345a1.pdf]

**Electronic supplementary information (ESI):**

**Aromatic sulfonium polyoxomolybdates: tuning the photochromic properties through substitutions on the counter ion moiety**

Ashwani Kumar,<sup>a</sup> Chullikkattil P. Pradeep\*<sup>a</sup>

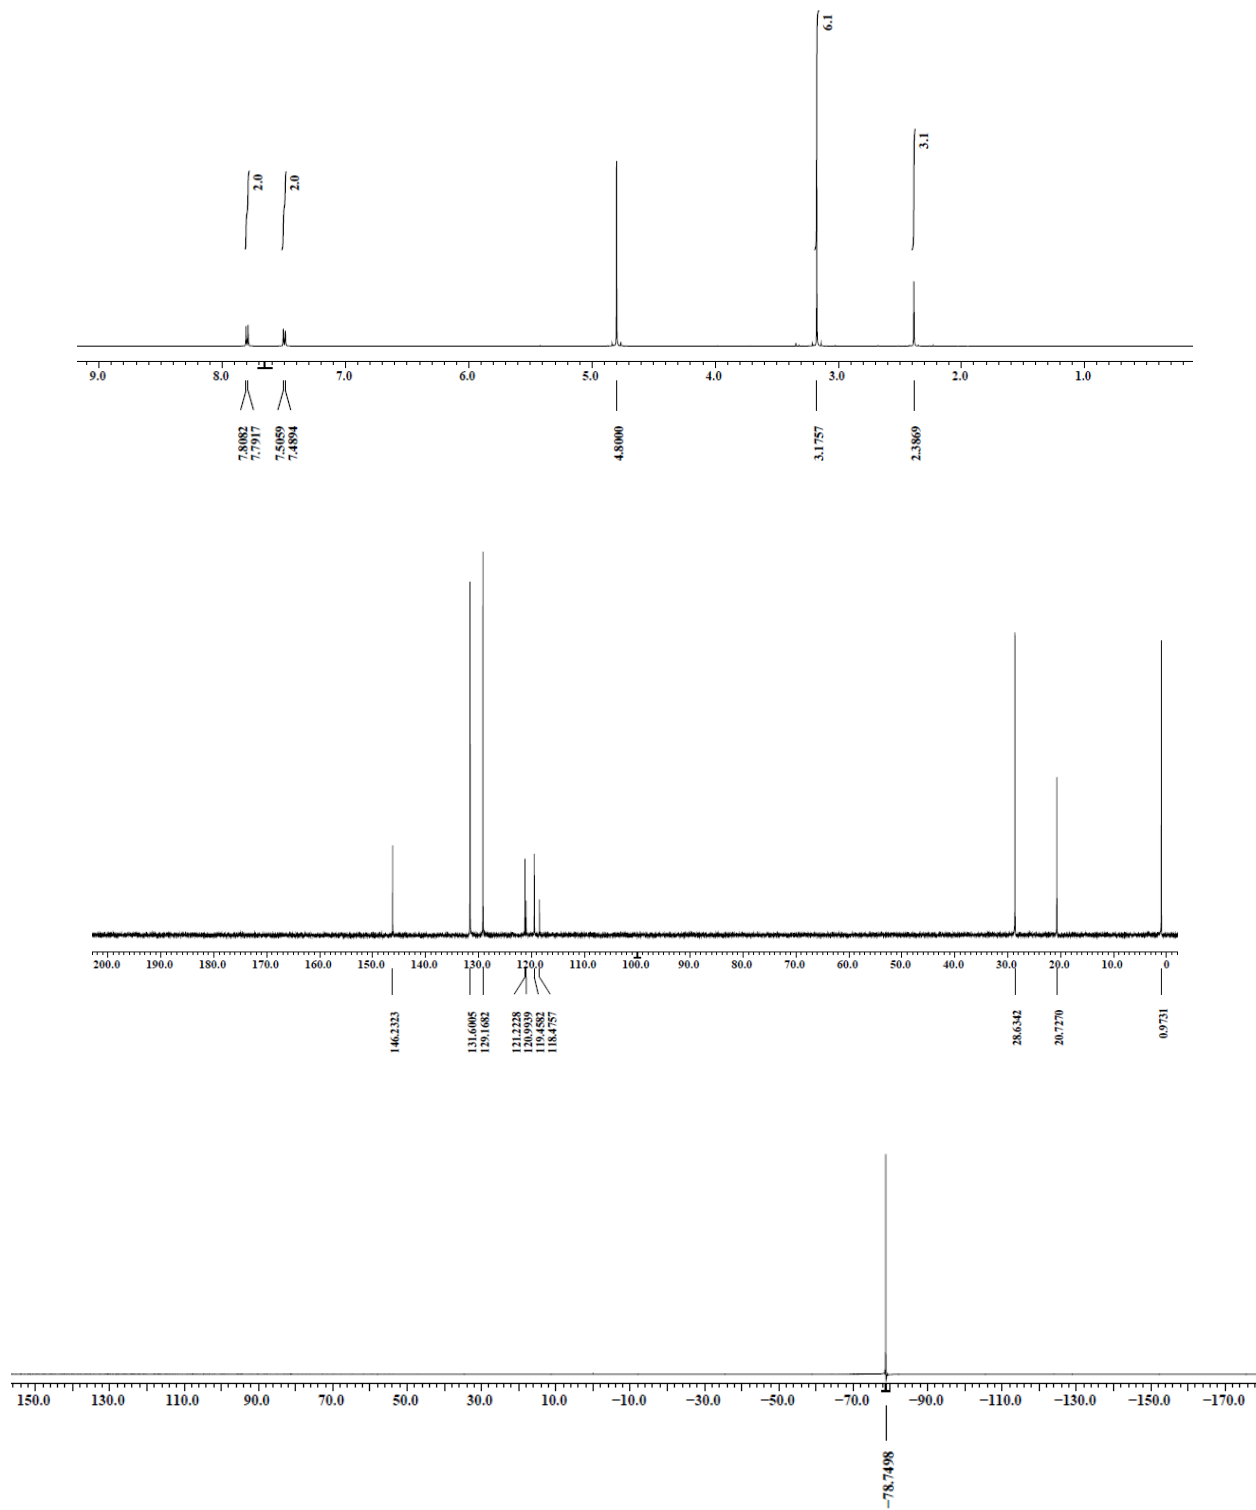

**Figure S1.** <sup>1</sup>H, <sup>13</sup>C and <sup>19</sup>F NMR spectra of DMTST in D<sub>2</sub>O.

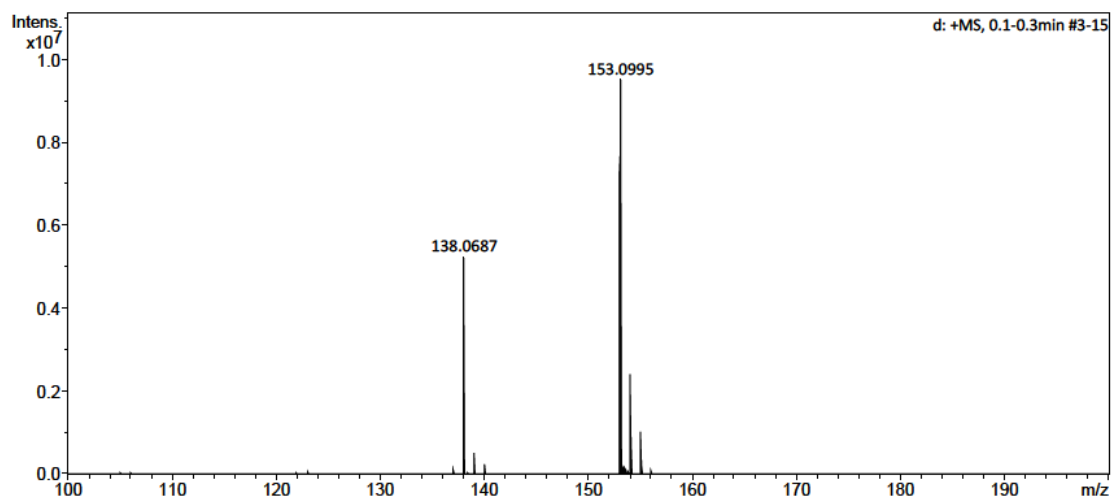

Figure S2. HR-MS of DMTST.

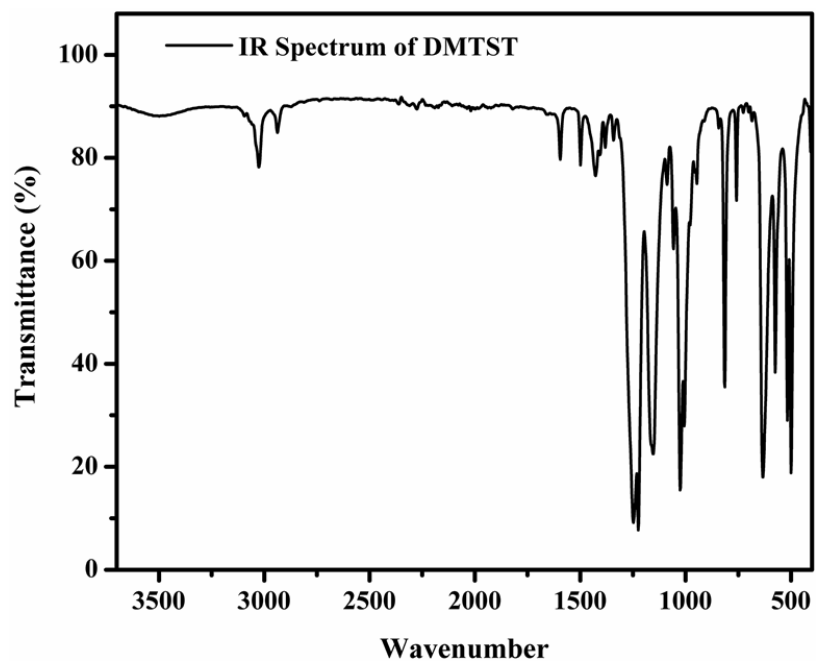

Figure S3. IR spectrum of DMTST.

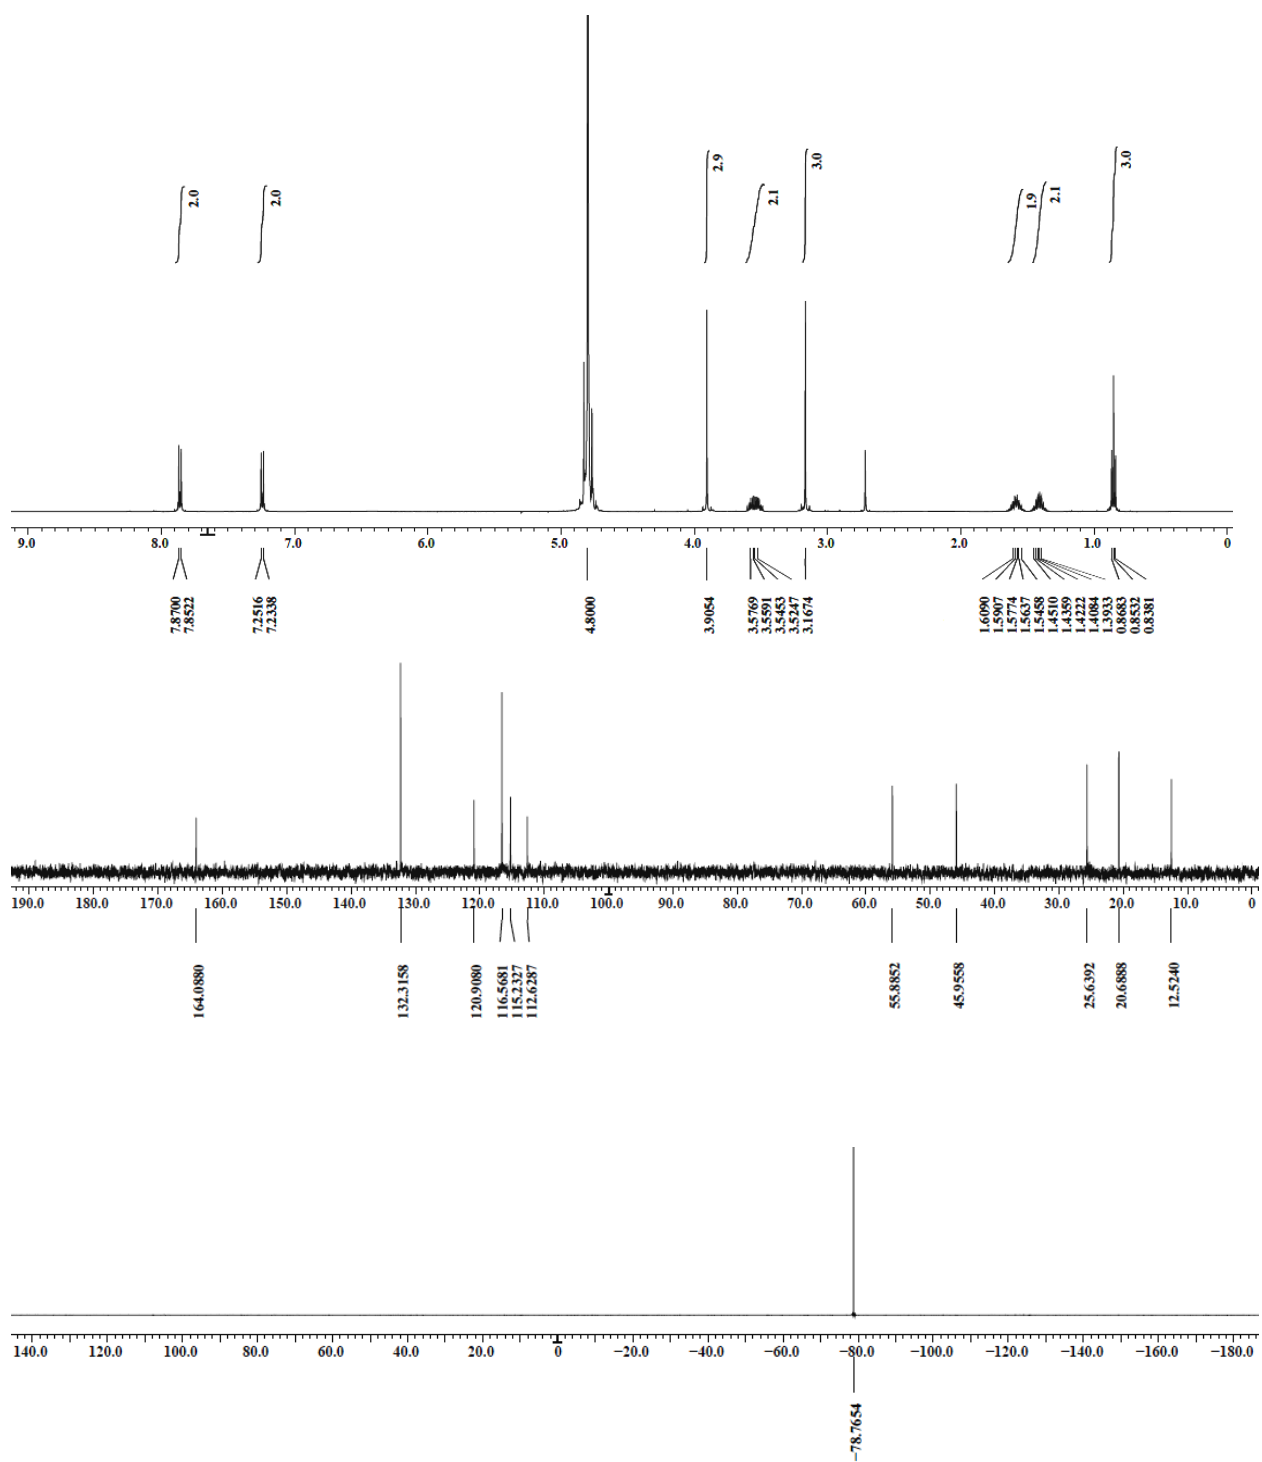

**Figure S4.** <sup>1</sup>H, <sup>13</sup>C and <sup>19</sup>F NMR spectra of BMPMST in D<sub>2</sub>O.

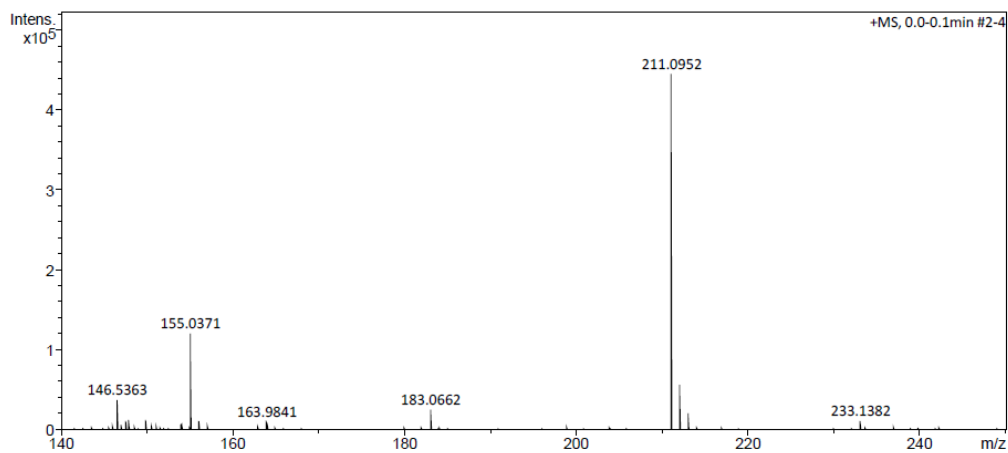

Figure S5. HR-MS of BMPMST.

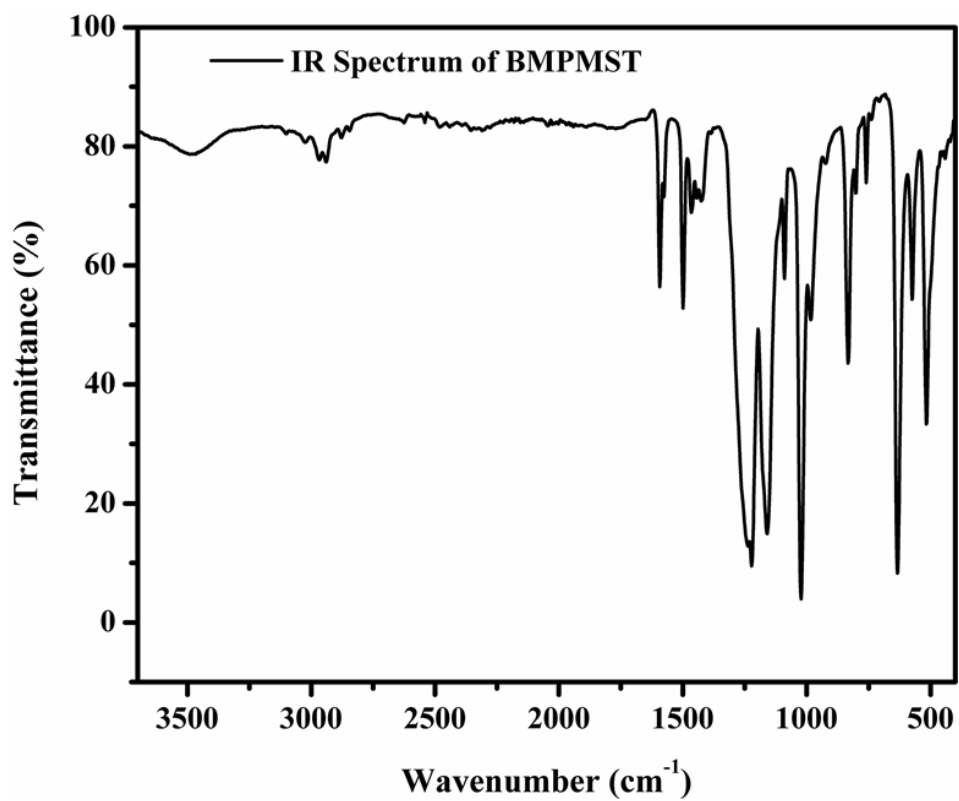

Figure S6. IR spectrum of BMPMST.

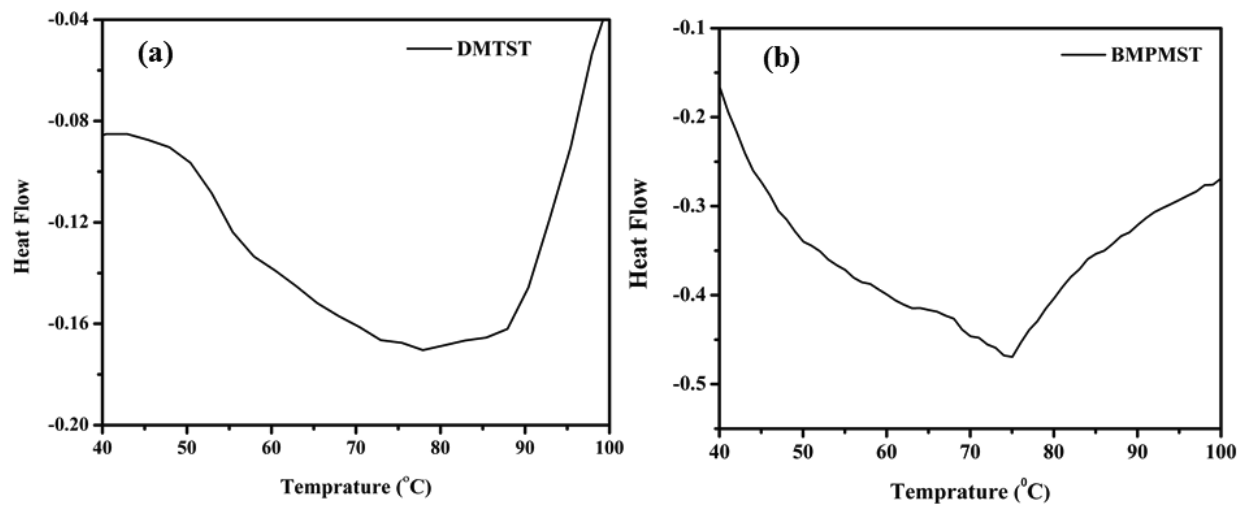

**Figure S7.** DSC curves of (a) DMTST and (b) BMPMST.

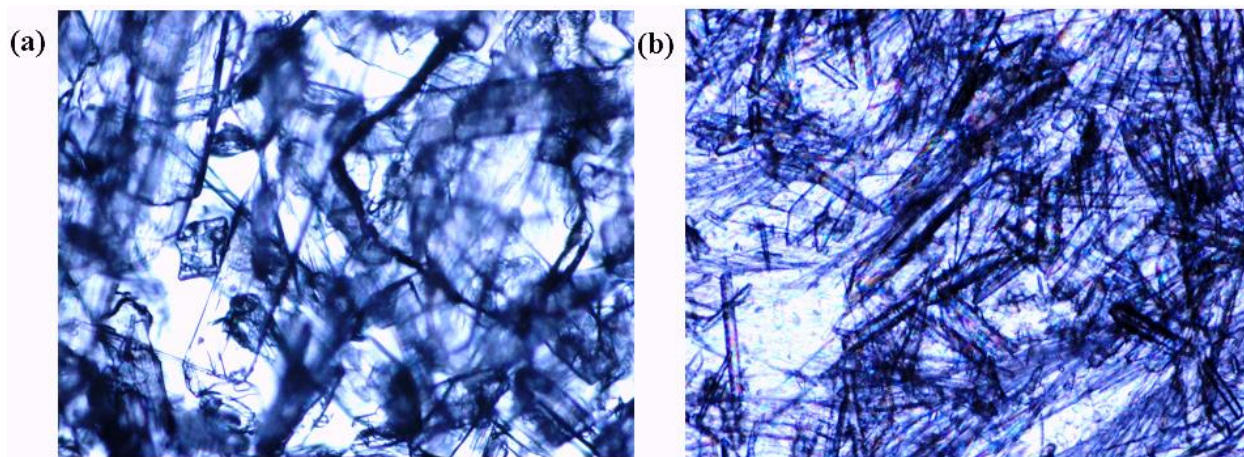

**Figure S8.** Polarised optical microscopic images of (a) DMTST and (b) BMPMST under crossed polariser at room temperature.

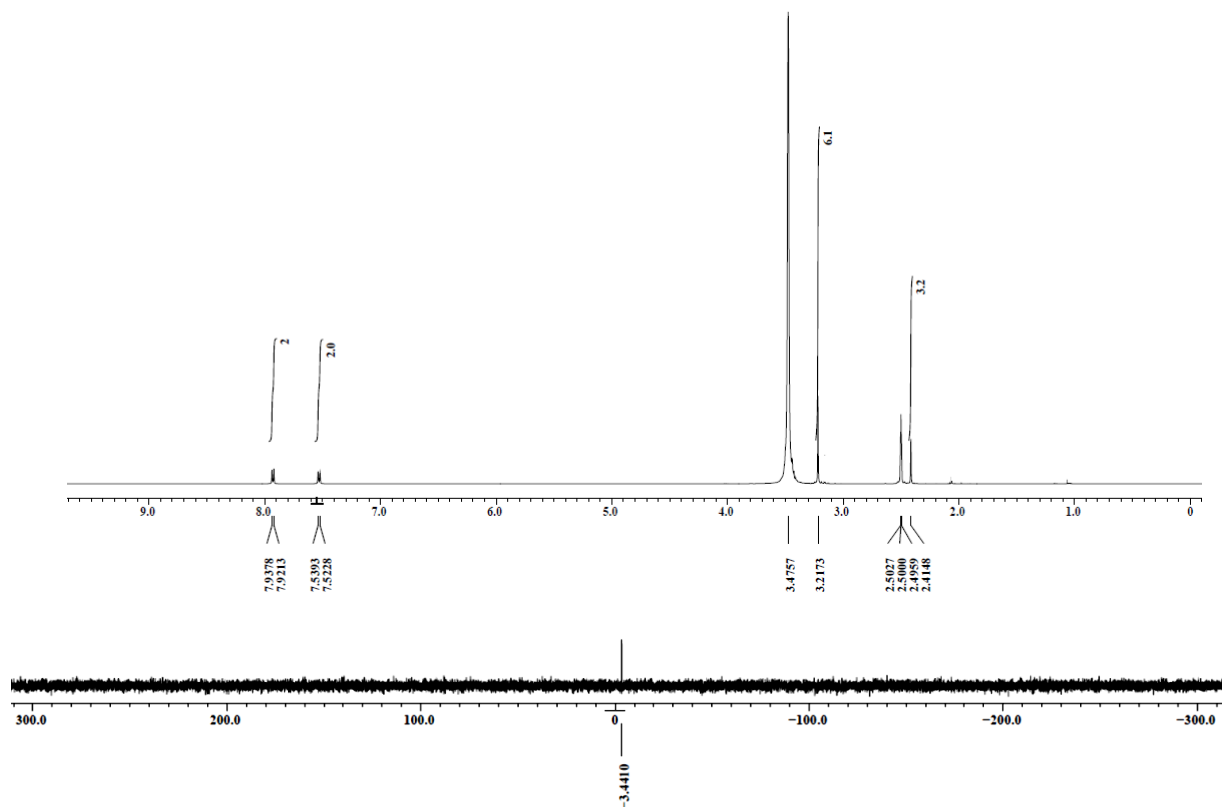

Figure S9. <sup>1</sup>H and <sup>31</sup>P NMR spectra of hybrid 1 in DMSO-*d*<sub>6</sub>.

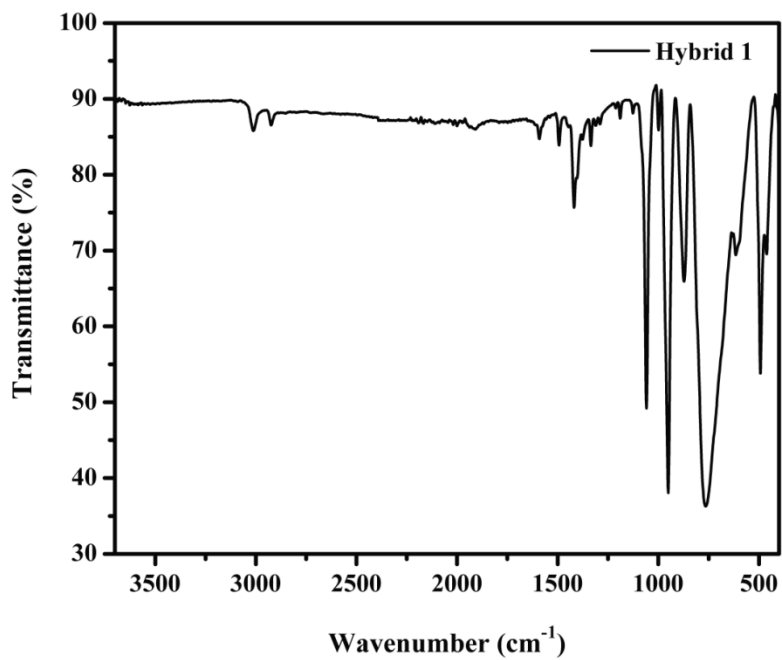

Figure S10. IR spectrum of hybrid 1.

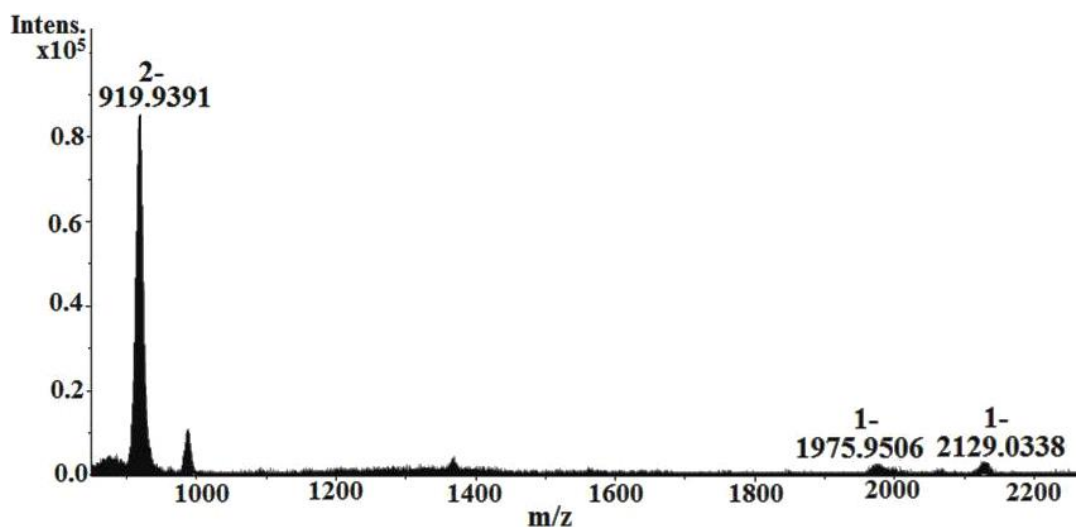

**Figure S11.** The negative ion mode ESI-MS of hybrid **1** in MeCN.

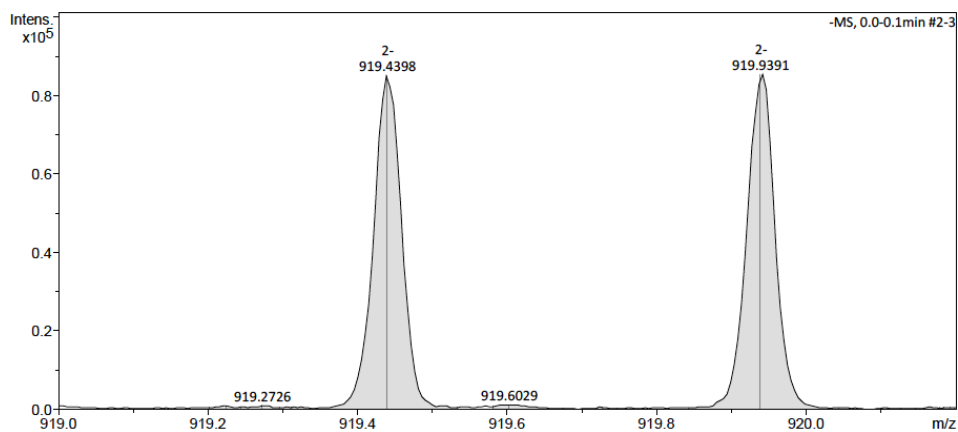

**Figure S12.** Zoom-in of the peak centered at  $m/z$  919.9391 in the ESI-MS of hybrid **1** to show its  $2^-$  charge state.

**Table S1.** Detailed assignment of mass spectral data for hybrid **1**.

| No.      | Ion (hybrid <b>1</b> )                                                 | Charge | $m/z$ calculated | $m/z$ observed |
|----------|------------------------------------------------------------------------|--------|------------------|----------------|
| <b>1</b> | $\text{H}[\text{PMo}_{12}\text{O}_{40}]^{2-} \cdot \text{H}_2\text{O}$ | $2^-$  | 920.62           | 919.93         |
| <b>2</b> | $\text{H}(\text{DMTS})[\text{PMo}_{12}\text{O}_{40}]^{1-}$             | $1^-$  | 1976.34          | 1975.95        |
| <b>3</b> | $(\text{DMTS})_2[\text{PMo}_{12}\text{O}_{40}]^{1-}$                   | $1^-$  | 2129.43          | 2129.03        |



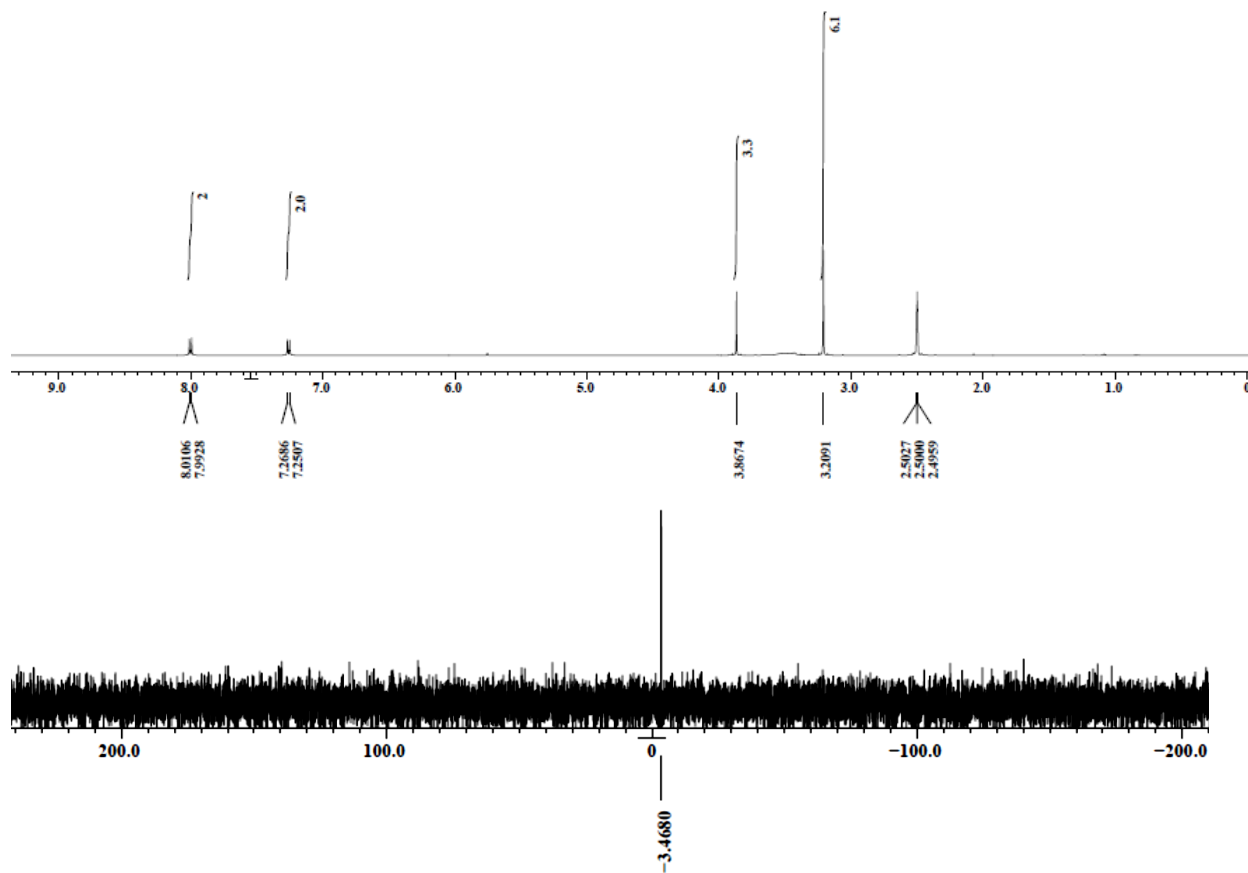

**Figure S13.** <sup>1</sup>H and <sup>31</sup>P NMR spectra of hybrid 2 in DMSO-d<sub>6</sub>.

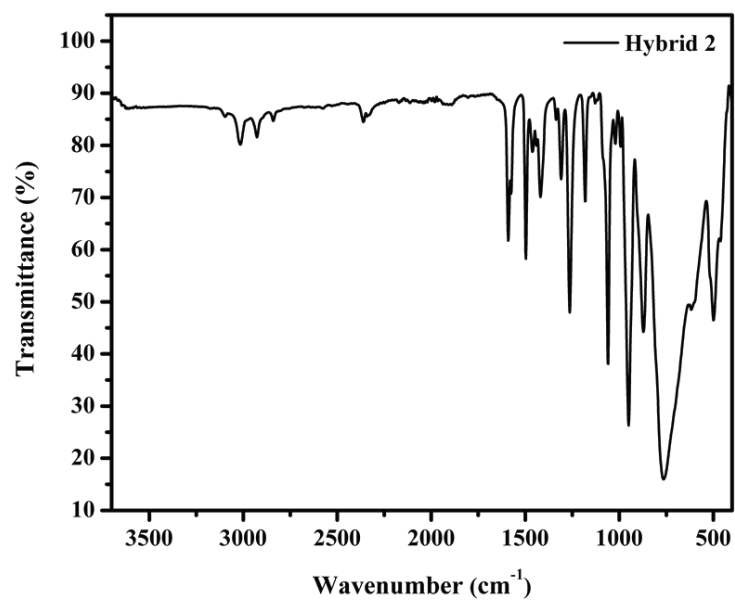

**Figure S14.** IR spectrum of hybrid 2.

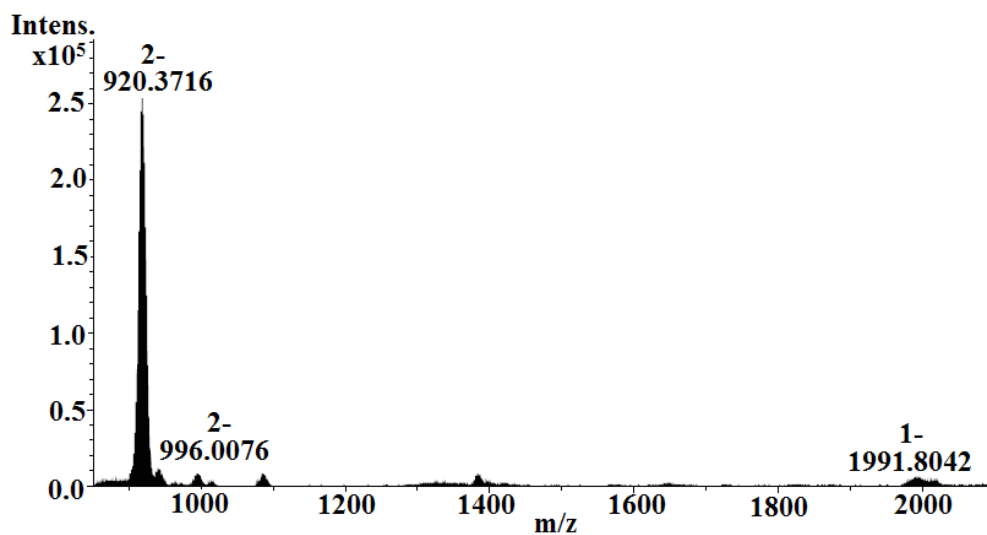

**Figure S15.** The negative ion mode ESI-MS of hybrid **2** in MeCN.

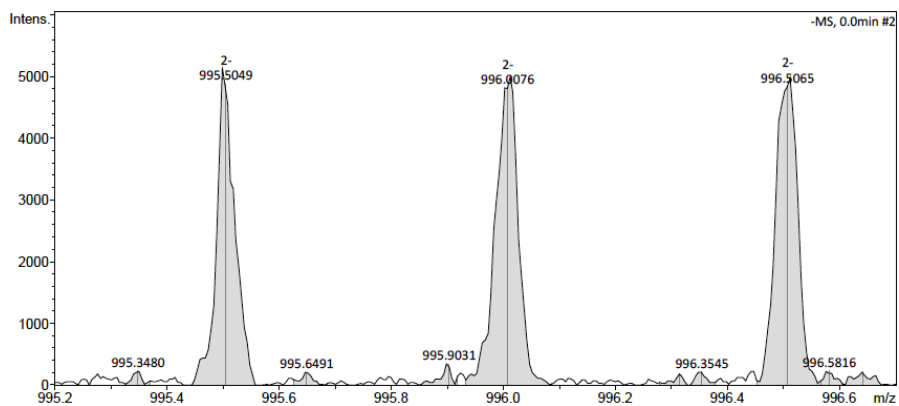

**Figure S16.** Zoom-in of the peak centered at  $m/z$  996.0076 in the ESI-MS of hybrid **2** to show its  $2^-$  charge state.

**Table S2.** Detailed assignment of mass spectral data for hybrid **2**.

| No. | Ion (hybrid <b>2</b> )                                                 | Charge | $m/z$ calculated | $m/z$ observed |
|-----|------------------------------------------------------------------------|--------|------------------|----------------|
| 1   | $\text{H}[\text{PMO}_{12}\text{O}_{40}]^{2-} \cdot \text{H}_2\text{O}$ | $2^-$  | 920.62           | 920.37         |
| 2   | $(\text{MPDS})[\text{PMO}_{12}\text{O}_{40}]^{2-}$                     | $2^-$  | 995.65           | 996.00         |
| 3   | $\text{H}(\text{MPDS})[\text{PMO}_{12}\text{O}_{40}]^{1-}$             | $1^-$  | 1992.31          | 1991.80        |

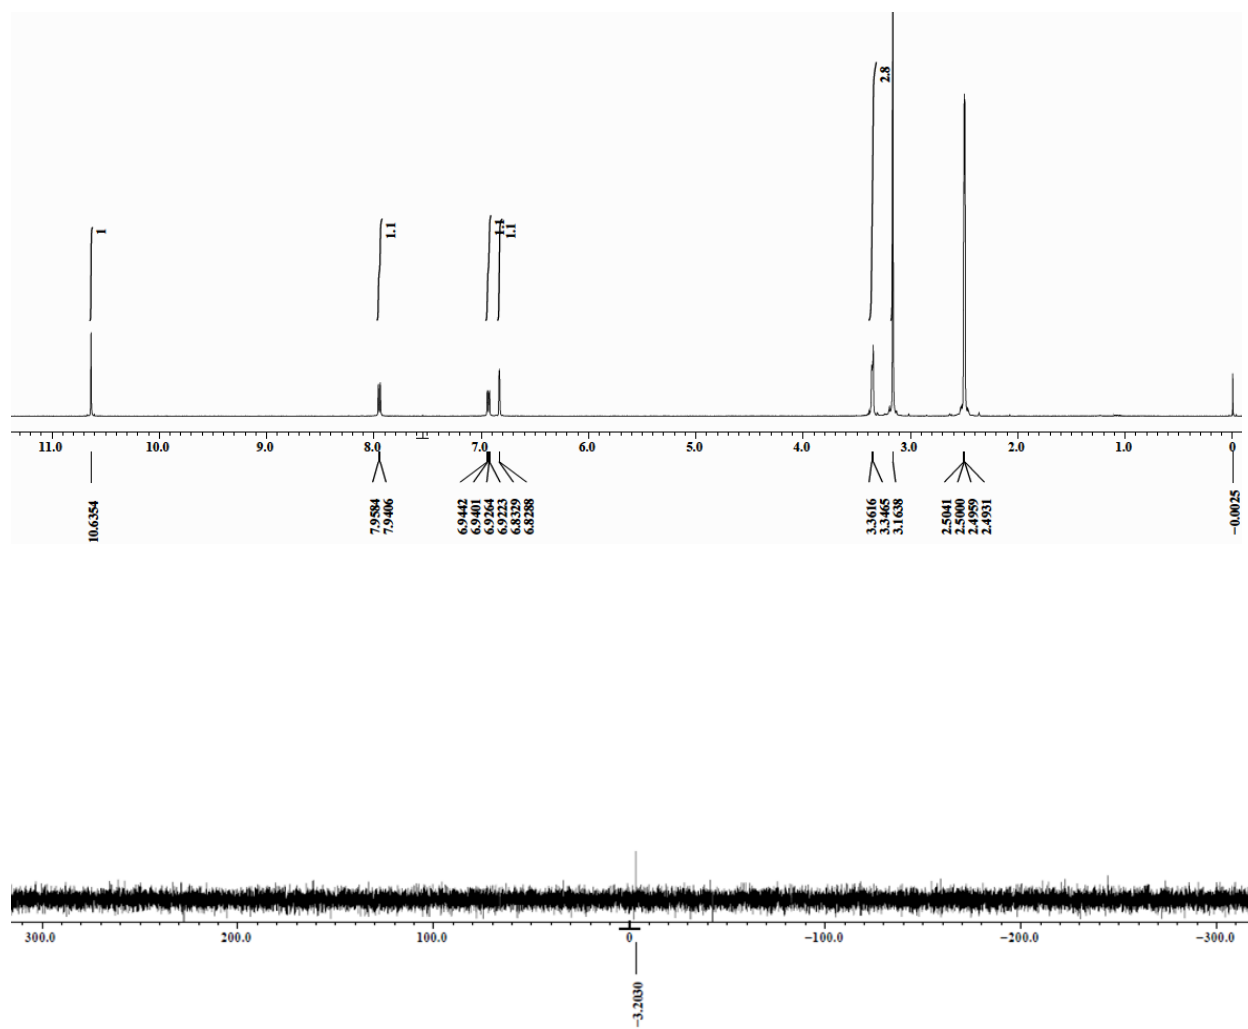

**Figure S17.** <sup>1</sup>H and <sup>31</sup>P NMR spectra of hybrid 3 in DMSO-*d*<sub>6</sub>.

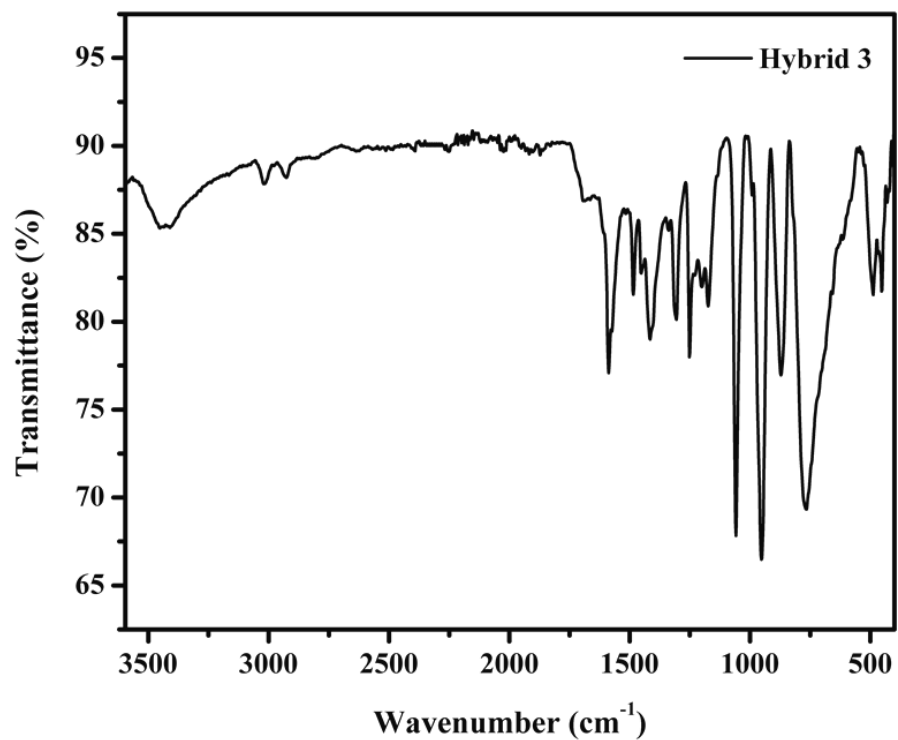

**Figure S18.** IR spectrum of hybrid **3**.

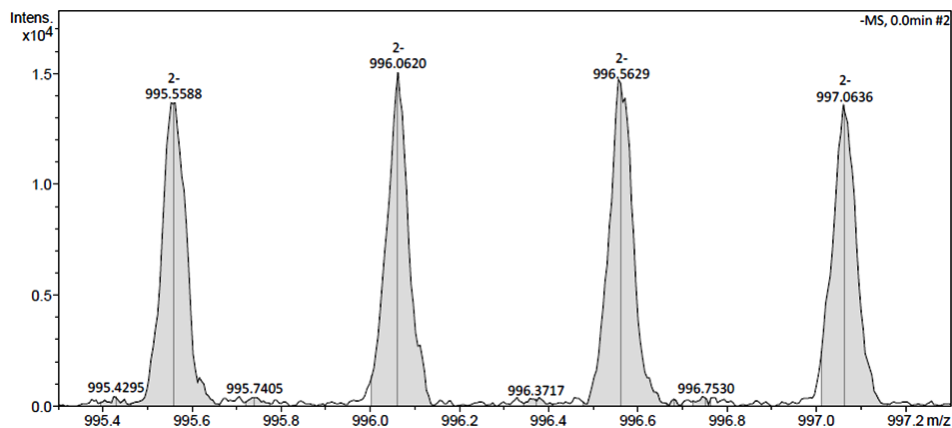

**Figure S19.** Zoom-in of the peak centered at  $m/z$  996.0620 in the ESI-MS of hybrid **3** to show its  $2^-$  charge state.

**Table S3.** Detailed assignment of mass spectral data for hybrid **3**.

| No. | Ion (hybrid 3)                                              | Charge | m/z calculated | m/z observed |
|-----|-------------------------------------------------------------|--------|----------------|--------------|
| 1   | $\text{H}[\text{PMo}_{12}\text{O}_{40}]^{2-}$               | 2-     | 911.62         | 911.01       |
| 2   | $(\text{HMPDS})[\text{PMo}_{12}\text{O}_{40}]^{2-}$         | 2-     | 995.65         | 996.06       |
| 3   | $\text{H}(\text{HMPDS})[\text{PMo}_{12}\text{O}_{40}]^{1-}$ | 1-     | 1992.31        | 1992.14      |
| 4   | $(\text{HMPDS})_2[\text{PMo}_{12}\text{O}_{40}]^{1-}$       | 1-     | 2160.38        | 2160.25      |

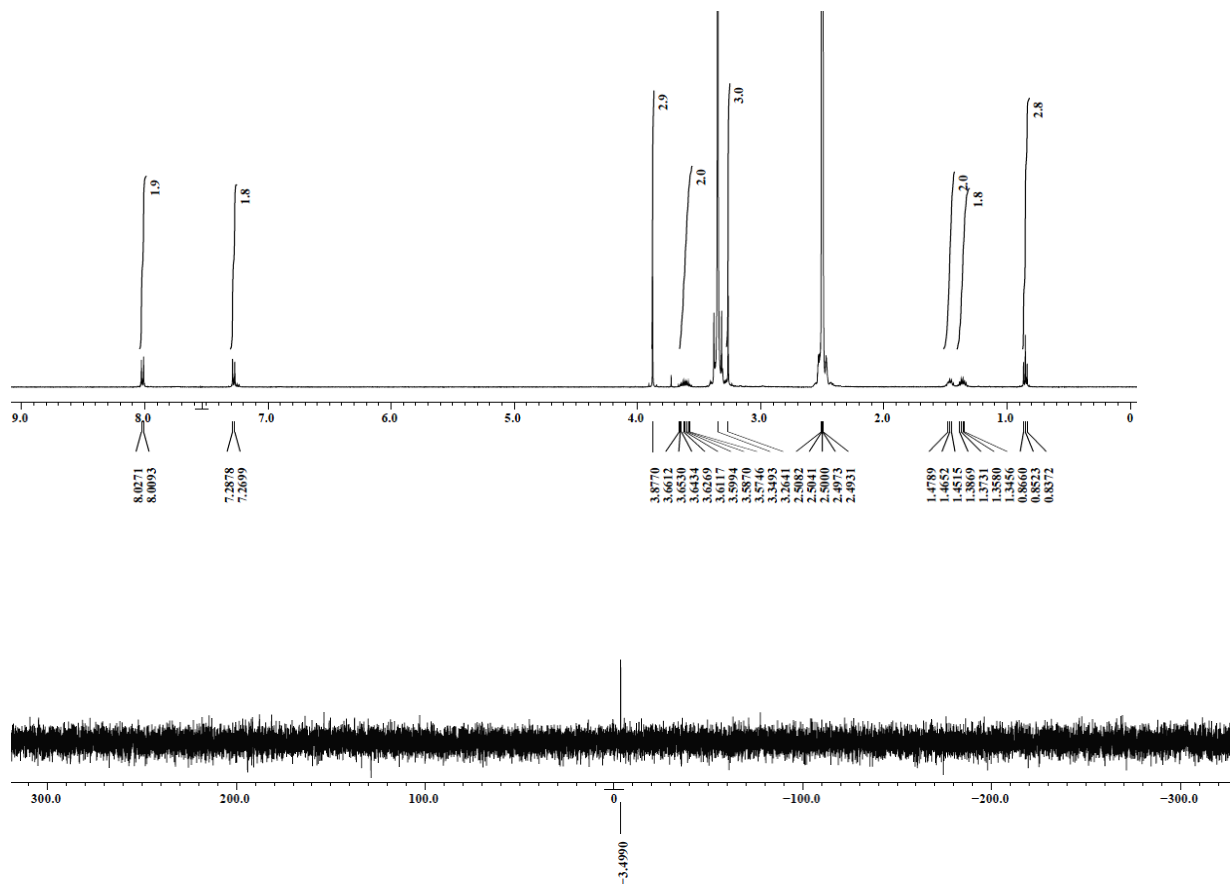

**Figure S20.** <sup>1</sup>H and <sup>31</sup>P NMR spectra of hybrid **4** in DMSO-*d*<sub>6</sub>.

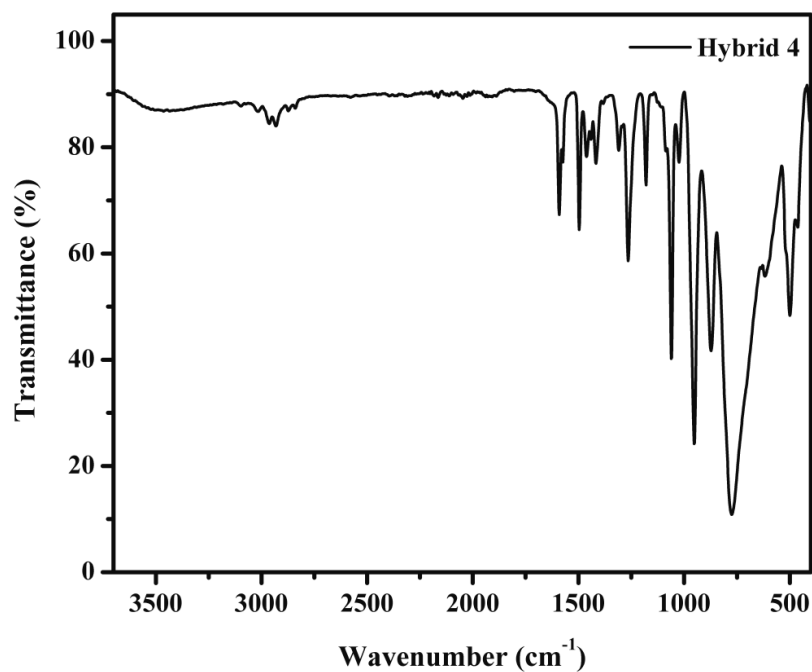

**Figure S21.** IR spectrum of hybrid 4.

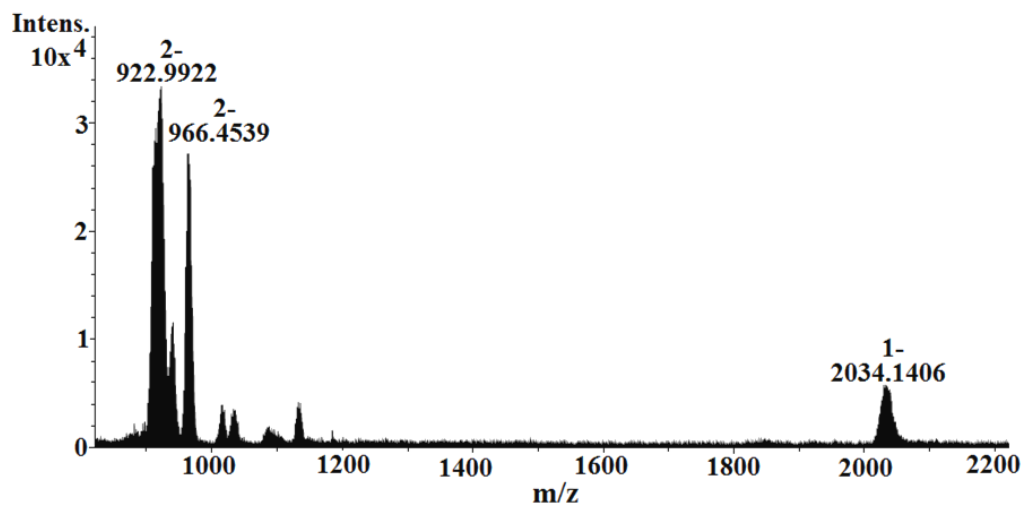

**Figure S22.** The negative ion mode ESI-MS of hybrid 4 in MeCN.

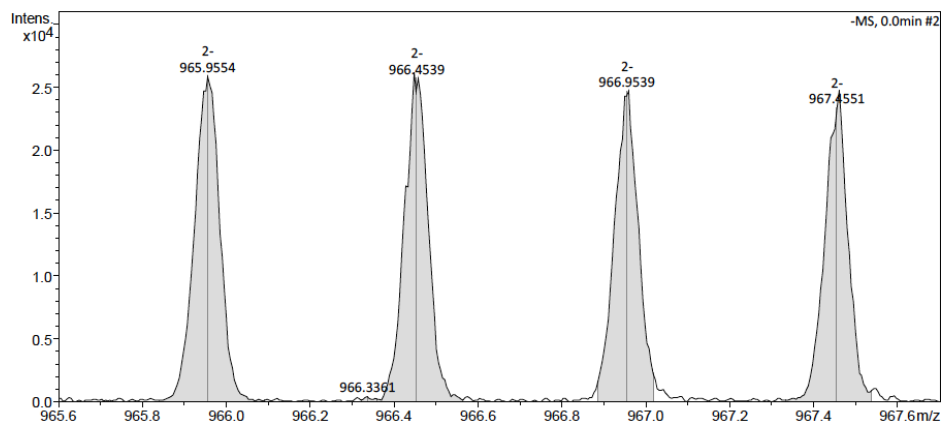

**Figure S23.** Zoom-in of the peak centered at  $m/z$  966.4539 in the ESI-MS of hybrid **4** to show its  $2^-$  charge state.

**Table S4.** Detailed assignment of mass spectral data for hybrid **4**.

| No.      | Ion (hybrid <b>4</b> )                                                  | Charge | $m/z$ calculated | $m/z$ observed |
|----------|-------------------------------------------------------------------------|--------|------------------|----------------|
| <b>1</b> | $\text{Na}[\text{PMO}_{12}\text{O}_{40}]^{2-}$                          | $2^-$  | 922.62           | 922.99         |
| <b>2</b> | $\text{K}[\text{PMO}_{12}\text{O}_{40}]^{2-} \cdot 4\text{H}_2\text{O}$ | $2^-$  | 966.62           | 966.45         |
| <b>3</b> | $\text{H}(\text{BMPMS})[\text{PMO}_{12}\text{O}_{40}]^{1-}$             | $1^-$  | 2034.34          | 2034.14        |

**Table S5.** The crystallographic data and structure refinement parameters of hybrids **1**, **2** and **4**.

|                                                       | <b>Hybrid 1</b>                                                                  | <b>Hybrid 2</b>                                                                  | <b>Hybrid 4</b>                                                                  |
|-------------------------------------------------------|----------------------------------------------------------------------------------|----------------------------------------------------------------------------------|----------------------------------------------------------------------------------|
| Empirical formula                                     | C <sub>27</sub> H <sub>39</sub> Mo <sub>12</sub> O <sub>40</sub> PS <sub>3</sub> | C <sub>27</sub> H <sub>39</sub> Mo <sub>12</sub> O <sub>43</sub> PS <sub>3</sub> | C <sub>36</sub> H <sub>57</sub> Mo <sub>12</sub> O <sub>43</sub> PS <sub>3</sub> |
| Formula weight                                        | 2282.01                                                                          | 2330.01                                                                          | 2456.25                                                                          |
| T/K                                                   | 293(2)                                                                           | 150.01(10)                                                                       | 149.99(10)                                                                       |
| Wavelength/Å                                          | 0.71073                                                                          | 0.71073                                                                          | 1.54184                                                                          |
| Crystal system                                        | trigonal                                                                         | trigonal                                                                         | triclinic                                                                        |
| Space group                                           | R-3                                                                              | R-3                                                                              | P-1                                                                              |
| <i>a</i> (Å)                                          | 20.3393(3)                                                                       | 20.1657(6)                                                                       | 12.4149(7)                                                                       |
| <i>b</i> (Å)                                          | 20.3393(3)                                                                       | 20.1657(6)                                                                       | 12.6395(6)                                                                       |
| <i>c</i> (Å)                                          | 23.9935(4)                                                                       | 24.1757(8)                                                                       | 23.2868(9)                                                                       |
| $\alpha$ (°)                                          | 90.00                                                                            | 90.00                                                                            | 95.806(4)                                                                        |
| $\beta$ (°)                                           | 90.00                                                                            | 90.00                                                                            | 95.886(4)                                                                        |
| $\gamma$ (°)                                          | 120.00                                                                           | 120.00                                                                           | 115.353(5)                                                                       |
| <i>V</i> (Å <sup>3</sup> )                            | 8596.0(3)                                                                        | 8514.0(4)                                                                        | 3241.7(3)                                                                        |
| <i>Z</i>                                              | 6                                                                                | 6                                                                                | 2                                                                                |
| D <sub>c</sub> (Mg m <sup>-3</sup> )                  | 2.645                                                                            | 2.727                                                                            | 2.516                                                                            |
| $\mu$ (mm <sup>-1</sup> )                             | 2.767                                                                            | 2.800                                                                            | 20.380                                                                           |
| <i>F</i> (000)                                        | 6528.0                                                                           | 6672.0                                                                           | 2368.0                                                                           |
| Crystal size (mm <sup>3</sup> )                       | 0.342x0.167x0.068                                                                | 0.271x0.136x0.114                                                                | 0.165 × 0.127 × 0.072                                                            |
| 2 $\theta$ (°)                                        | 4 to 56.76°                                                                      | 4.04 to 56.46°                                                                   | 7.74 to 133.96°                                                                  |
| Reflections collected                                 | 5544                                                                             | 5396                                                                             | 21623                                                                            |
| Independent reflections                               | 4121[R(int) = 0.0170]                                                            | 4083[R(int) = 0.0209]                                                            | 11367[R(int) = 0.0443]                                                           |
| Data / restraints / parameters                        | 4121/0/253                                                                       | 4083/0/262                                                                       | 11367/0/865                                                                      |
| Goodness-of-fit on F <sup>2</sup>                     | 1.110                                                                            | 1.159                                                                            | 1.050                                                                            |
| Final R indices [ <i>I</i> > 2 $\sigma$ ( <i>I</i> )] | R1 = 0.0682, wR2 = 0.1424                                                        | R1 = 0.0860, wR2 = 0.1780                                                        | R1 = 0.0420, wR2 = 0.1072                                                        |
| R indices (all data)                                  | R1 = 0.0741, wR2 = 0.1463                                                        | R1 = 0.0894, wR2 = 0.1797                                                        | R1 = 0.0500, wR2 = 0.1141                                                        |
| Largest diff. peak and hole (e.Å <sup>-3</sup> )      | 3.59 and -1.42                                                                   | 4.82 and -2.37                                                                   | 4.07/-1.22                                                                       |



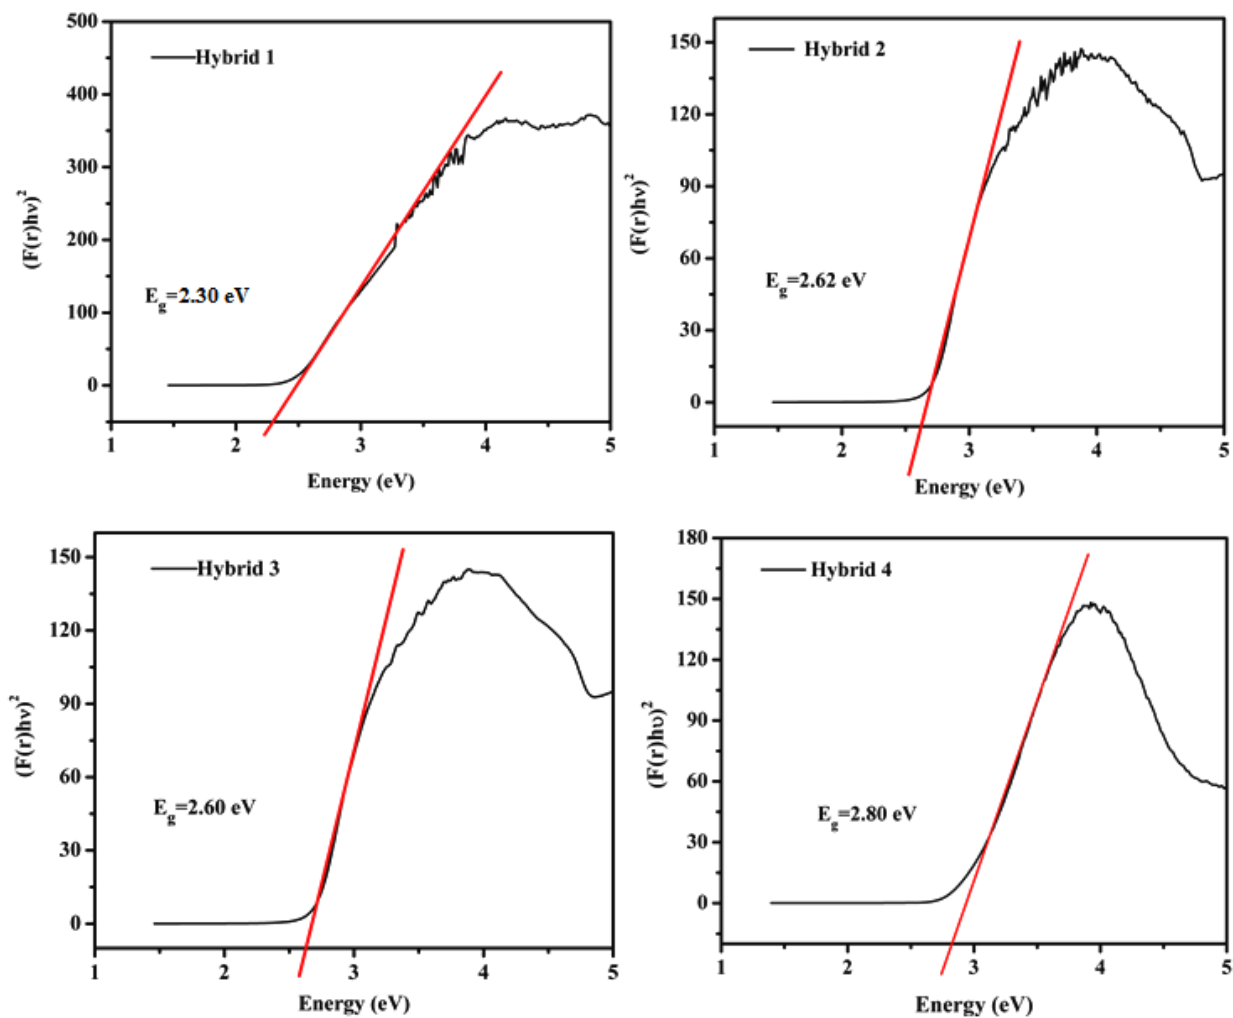

**Figure S24.** UV-Vis diffuse reflectance spectra: Kubelka-Munk (K-M) function vs energy (eV) plots of hybrids 1–4.

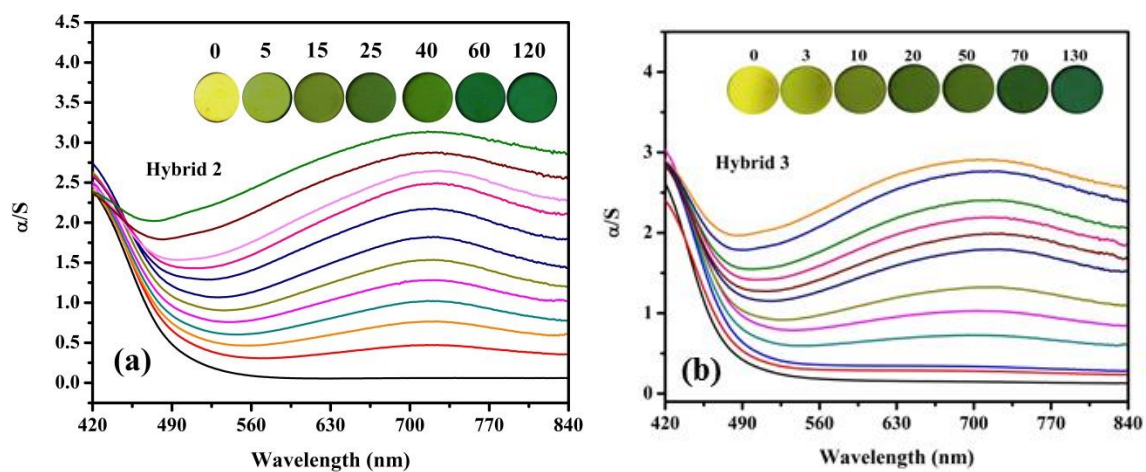

**Figure S25.** Kubelka-Munk (K-M) transformed reflectivity of (a) hybrid 2 and (b) hybrid 3 after irradiation with 350 nm UV lamp at various time intervals. Inset: the color change after various intervals of time.

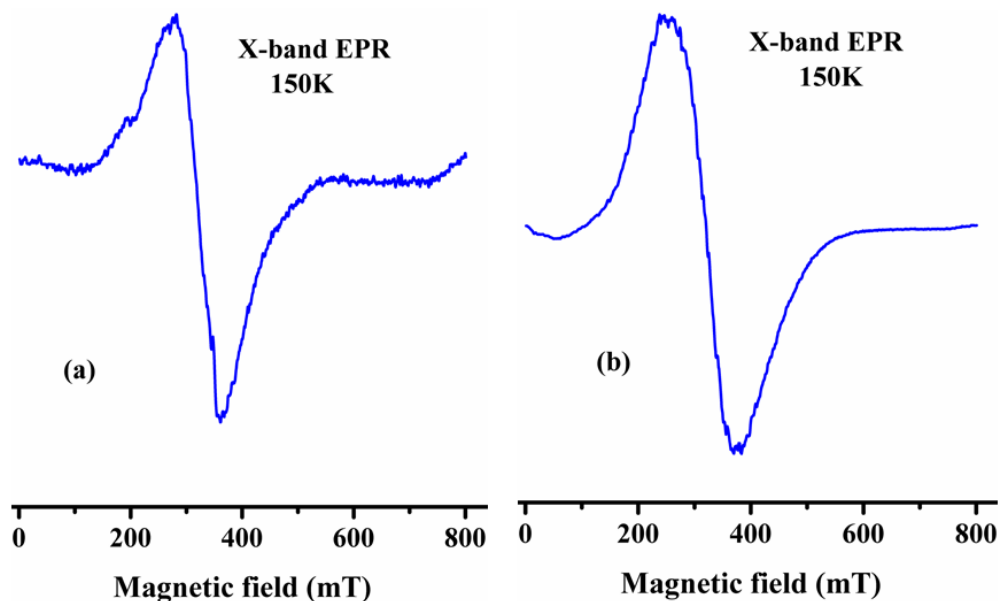

**Figure S26.** Powder X-band EPR spectra (recorded at 293 K) for (a) hybrid 3 and (b) hybrid 4 after irradiation with 350 nm UV lamp at 9.451, 9.452 GHz spectrometer frequencies respectively.

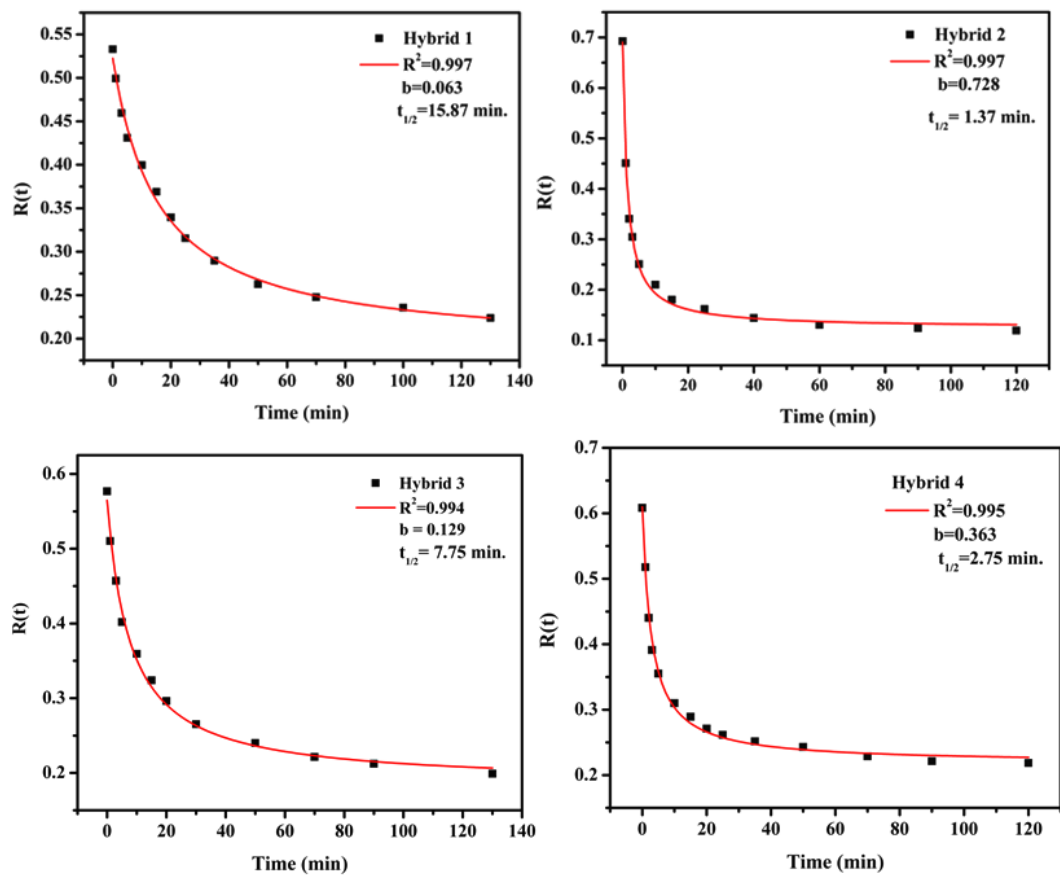

**Figure S27.** Reflectivity vs time plots for hybrids 1-4.

**Table S6.** Optical characteristics and coloration kinetics parameters of hybrids 1-4.

|                               | Hybrid 1 | Hybrid 2 | Hybrid 3 | Hybrid 4 |
|-------------------------------|----------|----------|----------|----------|
| $\lambda_{\max}(\text{nm})^p$ | 710      | 710      | 700      | 730      |
| $R^{\lambda_{\max}}(0)^q$     | 0.533    | 0.693    | 0.576    | 0.608    |
| $R^{2r}$                      | 0.997    | 0.997    | 0.994    | 0.995    |
| $b^s$                         | 0.063    | 0.728    | 0.129    | 0.363    |
| $R^{2r}$                      | 0.998    | 0.999    | 0.999    | 0.999    |
| $B^t$                         | 0.347    | 0.956    | 0.540    | 0.699    |
| $t_{1/2}^u$                   | 15.87    | 1.37     | 7.75     | 2.75     |

<sup>p</sup>Photo-induced absorption band wavelength.

<sup>q</sup>Reflectance value before UV irradiation ( $t = 0$ ) at  $\lambda_{\max}$ .

<sup>r</sup>Regression coefficient.

<sup>s</sup>Salient coloration kinetic parameter.

<sup>t</sup>Coloration kinetics parameters for the linear relation  $[R_{\lambda_{\max}}(t) - R_{\lambda_{\max}}(\infty)]^{-1} = Bt + A$ .

<sup>u</sup>Half life time (min.) of photochromic process.

**Table S7.** Comparison of the minimum coloration kinetics half-life times of some reported photochromic hybrid POMs.

| Sr. No. | Hybrid POM                                                                                                                                                                                                                                | Minimum coloration kinetic half life time ( $t_{1/2}$ ) obtained | Reference    |
|---------|-------------------------------------------------------------------------------------------------------------------------------------------------------------------------------------------------------------------------------------------|------------------------------------------------------------------|--------------|
| 1       | (MPDS) <sub>3</sub> [PMO <sub>12</sub> O <sub>40</sub> ] (Hybrid 2)                                                                                                                                                                       | 1.37 min                                                         | Present work |
| 2       | (MPDS) <sub>4</sub> [Mo <sub>8</sub> O <sub>26</sub> ]                                                                                                                                                                                    | 0.33 min                                                         | Ref. 1       |
| 3       | NaKMo <sub>6</sub> (Ale-4Py) <sub>2</sub>                                                                                                                                                                                                 | 0.37 min                                                         | Ref. 2       |
| 4       | (H <sub>2</sub> DABCO) <sub>2</sub> (HDMA) <sub>0.5</sub> Na <sub>0.75</sub> (H <sub>3</sub> O) <sub>0.75</sub> [Mo <sub>8</sub> O <sub>27</sub> ]·3H <sub>2</sub> O                                                                      | 0.8 min                                                          | Ref. 3       |
| 5       | (APDS) <sub>4</sub> [SiMo <sub>12</sub> O <sub>40</sub> ]                                                                                                                                                                                 | 1.01 min                                                         | Ref. 4       |
| 6       | (Mo <sub>6</sub> -Ale)                                                                                                                                                                                                                    | 2.87 min                                                         | Ref. 5       |
| 7       | Rb <sub>0.75</sub> (NH <sub>4</sub> ) <sub>5.25</sub> [(Mo <sub>3</sub> O <sub>8</sub> ) <sub>2</sub> O(O <sub>3</sub> PC(CH <sub>2</sub> S(CH <sub>3</sub> ) <sub>2</sub> )-OPO <sub>3</sub> ) <sub>2</sub> ]·8H <sub>2</sub> O          | 4.84 min                                                         | Ref. 6       |
| 8       | Na <sub>7</sub> (N(C <sub>4</sub> H <sub>9</sub> ) <sub>4</sub> )[(Mo <sub>3</sub> O <sub>8</sub> ) <sub>4</sub> (O <sub>3</sub> PC(C <sub>3</sub> H <sub>6</sub> NH <sub>3</sub> )(O)PO <sub>3</sub> ) <sub>4</sub> ].43H <sub>2</sub> O | 7.40 min                                                         | Ref. 7       |

## References

- 1 A. Kumar, A. K. Gupta; M. Devi, K. E. Gonsalves and C. P. Pradeep, *Inorg. Chem.*, 2017, **56**, 10325.
  - 2 O. Oms, T. Benali, J. Marrot, P. Mialane, M. Puget, H. Serier-Brault, P. Deniard, R. Dessapt and A. Dolbecq, *Inorganics*, 2015, **3**, 279.
  - 3 R. Dessapt, M. Collet, V. Coue, M. Bujoli-Doeuff, S. Jobic, C. Lee and M.-H. Whangbo, *Inorg. Chem.*, 2009, **48**, 574.
  - 4 A. Kumar, M. Devi, N. Mamidi, K. E. Gonsalves and C. P. Pradeep, *Chem. Eur. J.*, 2015, **21**, 18557.
  - 5 H. E. Moll, A. Dolbecq, I. M. Mbomekalle, J. Marrot, P. Deniard, R. Dessapt and P. Mialane, *Inorg. Chem.*, 2012, **51**, 2291.
  - 6 K. Hakouk, O. Oms, A. Dolbecq, H. E. Moll, J. Marrot, M. Evain, F. Molton, C. Duboc, P. Deniard, S. Jobic, P. Mialane and R. Dessapt, *Inorg. Chem.*, 2013, **52**, 555.
  - 7 J.-D. Compain, P. Deniard, R. Dessapt, A. Dolbecq, O. Oms, F. Secheresse, J. Marrot and P. Mialane, *Chem. Commun.*, 2010, **46**, 7733.
-
